# Supplementary material for: TonEBP/NFAT5 promotes obesity and insulin resistance by epigenetic suppression of white adipose tissue beiging
Source: PubMed Central journal article supplement (PMC6684655; doi:10.1038/s41467-019-11302-w), 2019-08-06
Supplement: 41467_2019_11302_MOESM1_ESM.pdf [file 41467_2019_11302_MOESM1_ESM.pdf]

## **Supplementary Information**

**TonEBP/NFAT5 promotes obesity and insulin resistance by  
epigenetic suppression of white adipose tissue beiging**

**Lee *et al.***

**Supplementary Table 1. Primers used for real time PCR**

| Species | Gene                            | Forward primer (5'-3')      | Reverse primer (5'-3')      |
|---------|---------------------------------|-----------------------------|-----------------------------|
| Mouse   | <i>36B4</i>                     | TGGCCAATAAGGTGCCAGCTGCTG    | CTTGTCTCCAGTCTTTATCAGCTGCAC |
|         | <i>Acadm</i>                    | AGGATGACGGAGCAGCCAATGA      | GCCGTTGATAACATACTCGTCAC     |
|         | <i>ACC1</i>                     | CTGACGTATACTGAACTGGTGTGGATG | TTTCCAGGCTACCATGCCAATCTC    |
|         | <i>Acox1</i>                    | GCCATTCGATACAGTGCTGTGAG     | CCGAGAAAGTGGAAGGCATAGG      |
|         | <i>Adiponectin</i>              | TGGAATGACAGGAGCTGAAGG       | ACACTGAACGCTGAGCGATACACA    |
|         | <i>Adrb3</i>                    | AGGCACAGGAATGCCACTCCAA      | GCTTAGCCACAACGAACACTCG      |
|         | <i>CD137</i>                    | CCAAGTACCTTCTCCAGCATAGG     | GCGTTGTGGGTAGAGGAGCAAA      |
|         | <i>CD36</i>                     | GAACCACTGCTTTCAAAACTGG      | TGCTGTTCTTTGCCACGTCA        |
|         | <i>Cidea</i>                    | GGTGGACACAGAGGAGTTCTTTC     | CGAAGGTGACTCTGGCTATTCC      |
|         | <i>CPT1<math>\alpha</math></i>  | GGCATAAACGCAGAGCATTCTCTG    | CAGTGTCCATCCTCTGAGTAGC      |
|         | <i>CyclophilinA</i>             | CTGCTGTCTTTGAACTTTGTCTG     | CAGCCATGGTCAACCCACC         |
|         | <i>Dio2</i>                     | GGTGGTCAACTTTGGTTCAGCC      | AAGTCAGCCACCGAGGAGAACT      |
|         | <i>F4/80</i>                    | CTTTGGCTATGGGCTTCCAGTC      | GCAAGGAGGACAGAGTTTATCGTG    |
|         | <i>Fasn</i>                     | CCAGACAGAGAAGAGCCATGGAGG    | CCAATGAGGTTGGCCAGAACTCC     |
|         | <i>HSL</i>                      | GCTGGGCTGTCAAGCACTGT        | GTAAGTGGGTAGGCTGCCAT        |
|         | <i>Leptin</i>                   | GGGCTTCACCCATTCTGA          | TGGCTATCTGCAGCACATTTTG      |
|         | <i>Lipe</i>                     | GCTCATCTCCTATGACCTACGG      | TCCGTGGATGTGAACAACCAGG      |
|         | <i>LPL</i>                      | GCGTAGCAGGAAGTCTGACCAA      | AGCGTCATCAGGAGAAAAGGCGA     |
|         | <i>PGC1<math>\alpha</math></i>  | GAGAATGAGGCAAACCTTGCTAGCG   | TGCATGGTTCTGAGTGCTAAGACC    |
|         | <i>PPAR<math>\alpha</math></i>  | AAGACTACCTGCTACCGAAATG      | AACATTGGGCCCGTTAAGA         |
|         | <i>PPAR<math>\gamma</math></i>  | TTCGCTGATGCACTGCCTATGA      | AAGGAATGCGAGTGGTCTTCCA      |
|         | <i>PPAR<math>\gamma</math>2</i> | TCTTAACTGCCGGATCCACAA       | GCCCAAACCTGATGGCATT         |
|         | <i>Scd1</i>                     | TTCTTGGCATACTCTGGTGC        | CGGGATTGAATGTTCTTGTCTGT     |
|         | <i>Slc27a1</i>                  | TGCCACAGATCGGCGAGTTCTA      | AGTGGCTCCATCGTGTCCCTCAT     |
|         | <i>Slc2a4</i>                   | GGTGTGGTCAATACGGTCTTCAC     | AGCAGAGCCACGGTCATCAAGA      |
|         | <i>SREBP1c</i>                  | GCCGTGGTGAGAAGCGCACAGCCC    | CAAGACAGCAGATTTATTCAGCTTTGC |
|         | <i>TMEM26</i>                   | TGGTCTTGATACAGTGCTCAC       | GGTGCATTTCAAGAAGCCACAGG     |
|         | <i>TNF<math>\alpha</math></i>   | TGGGACAGTGACCTGGACTGT       | TTCGGAAAGCCCATTTGAGT        |
|         | <i>TonEBP</i>                   | AAGCAGCCACCACCAACATGA       | AAATTGCATGGGCTGCTGCT        |
|         | <i>UCP-1</i>                    | GTGAACCCGACAACCTCCGAA       | TGAAACTCCGGCTGAGAAGAT       |
| Human   | <i>36B4</i>                     | TGGTCATCCAGCAGGTGTTCTGA     | ACAGACTGGCAACATTGCGG        |
|         | <i>Adrb3</i>                    | ATTGCTTGGGTTGGTCAAATG       | AAGGTGAGTGGGAAGGTAGA        |
|         | <i>CyclophilinA</i>             | TTCATCTGCACTGCCAAGAC        | TCGAGTTGTCCACAGTCAGC        |
|         | <i>TonEBP</i>                   | AGCTGTTGTTGCTGCTGATGCT      | TCCACTTGCATAGCCTTGCTGT      |

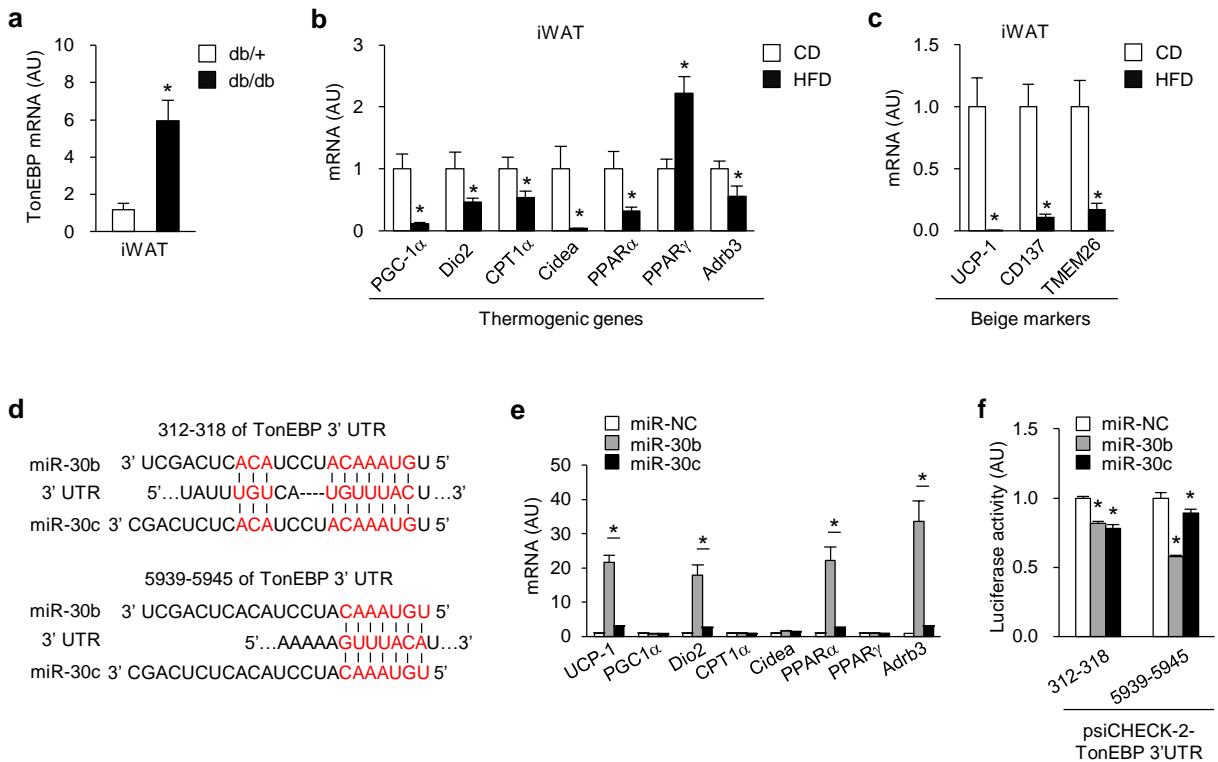

**Supplementary Figure 1. Effects of diet and miR on TonEBP, and thermogenic and beige marker genes in adipose tissues and adipocytes.**

**a** TonEBP expression in db/db mice. *TonEBP* mRNA levels in iWAT from 10 weeks old +/db or db/db mice on C57BL/6J background (+/db,  $n = 5$ ; db/db,  $n = 7$ ). Data are representative of two independent experiments and presented as mean + s.e.m. \*  $p < 0.05$  vs. db/+. **b, c** Thermogenic (**b**) and beige marker (**c**) gene expression in iWAT. mRNA levels in iWAT from C57BL/6J mice fed a CD (chow diet,  $n = 5$ ) or HFD (high fat diet,  $n = 7$ ) for 16 weeks. All data are representative of four independent experiments and presented as mean + s.e.m. \*  $p < 0.05$  vs. CD. **d - f** miR30-b and miR30-c promotes thermogenic gene expression. (**d**) Potential sites of miR-30b and miR-30c hybridization on TonEBP 3'-UTR. (**e**) Thermogenic gene mRNA levels in 3T3-L1 adipocytes transfected with miR-negative control (NC), miR-30b or miR-30c ( $n = 4$ ). (**f**) HEK293 cells were transfected miR-NC, miR-30b or miR-30c followed by transfection of a reporter construct (312-318 or 5939-5945) containing 3'-UTR of TonEBP with putative miR-30b and miR-30c-binding sites ( $n = 4$ ). All data are representative of three independent experiments and presented as mean + s.d. \*  $p < 0.05$  vs. miR-NC. AU, arbitrary unit

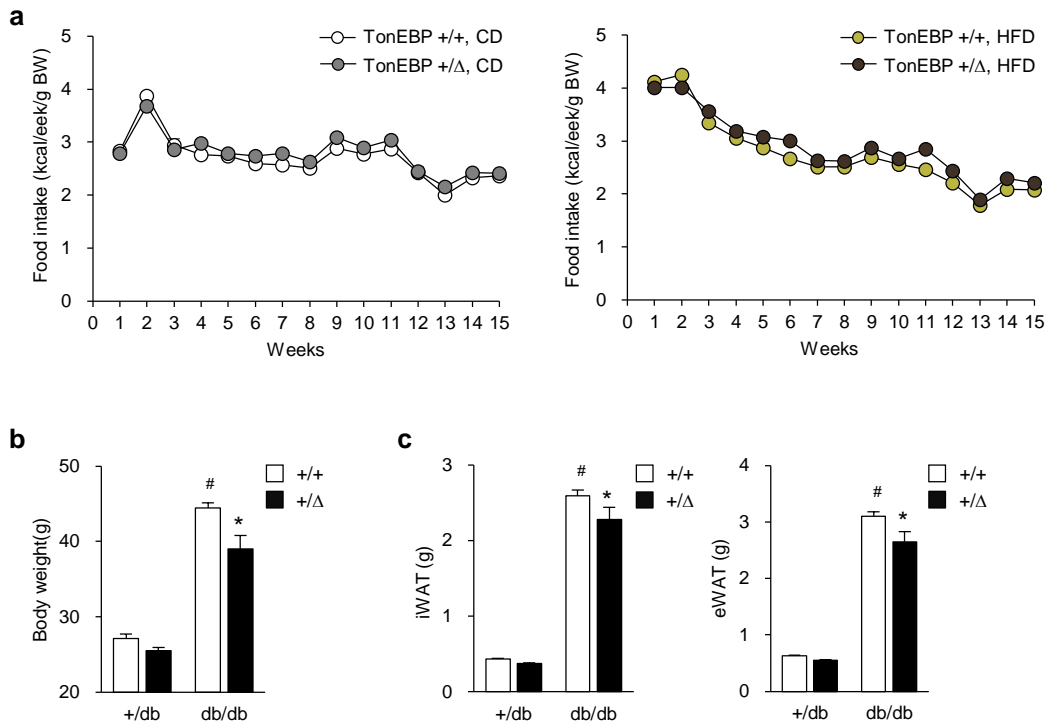

**Supplementary Figure 2. Effects of TonEBP haplo-deficiency on food intake and obesity.**

**a** Food intake was not affected by TonEBP haplo-deficiency. Food intake was measured in animals fed with CD ( $n = 5$ ) or HFD ( $n = 7$ ). All data are representative of four independent experiments and presented as mean + s.e.m. \*  $p < 0.05$  vs. +/+. Values of s.e.m. were all smaller than the size of circles for mean values. **b, c** TonEBP haplo-deficiency decreases whole body and fat pad weights in db/db mice (TonEBP +/+,  $n = 7$ ; TonEBP +/-,  $n = 10$ ). **(b)** Body weight of TonEBP haplo-insufficient (TonEBP +/-,  $n = 7$ ) mice on +/db or db/db background and their WT (TonEBP +/+,  $n = 10$ ) littermates. **(c)** Weight of iWAT and eWAT. All data are representative of two independent experiments and presented as mean + s.e.m. #  $p < 0.05$  vs. +/db and \*  $p < 0.05$  vs. TonEBP +/+.

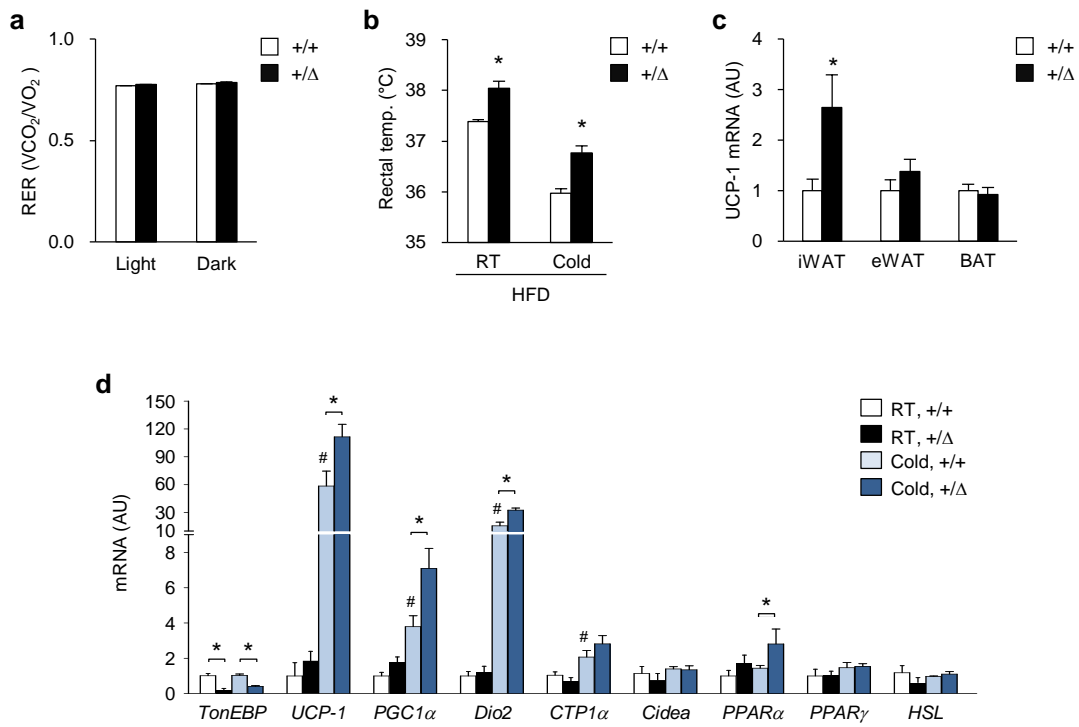

### Supplementary Figure 3. Effects of TonEBP haplo-deficiency on thermogenesis and beigeing.

**a** RER was not affected by TonEBP haplo-deficiency. HFD-fed animals were analyzed by indirect calorimetry to obtain RER ( $VCO_2/VO_2$ ) ( $n = 4$ ). Data are representative of three independent experiments. **b** Higher rectal temperature and resistance to cold in TonEBP haplo-deficiency. Rectal temperature (temp.) measured in HFD-fed animals at room temperature (RT) and after exposure to 4°C (Cold) for 6 h ( $n = 5$ ). **c** Elevated iWAT *UCP-1* mRNA expression in TonEBP haplo-deficiency. *UCP-1* mRNA levels in iWAT, eWAT and BAT from WT (+/+) and TonEBP haplo-deficient mice (+/ $\Delta$ ) ( $n = 8$ ). **d** Elevated expression of thermogenic genes in TonEBP haplo-deficiency. mRNA abundance of thermogenic genes in iWAT of CD-fed animals exposed to RT or 4°C (cold) ( $n = 10$ ). Data are presented as mean + s.e.m. #  $p < 0.05$  vs. RT (**d**), \*  $p < 0.05$  vs. +/+ (**b-d**). (**a-c**) An unpaired t-test was used for comparisons between two conditions. (**d**) A 1-way ANOVA was used for comparisons between more than two conditions. Tukey's post-hoc test was used for multiple comparisons. AU, arbitrary unit.

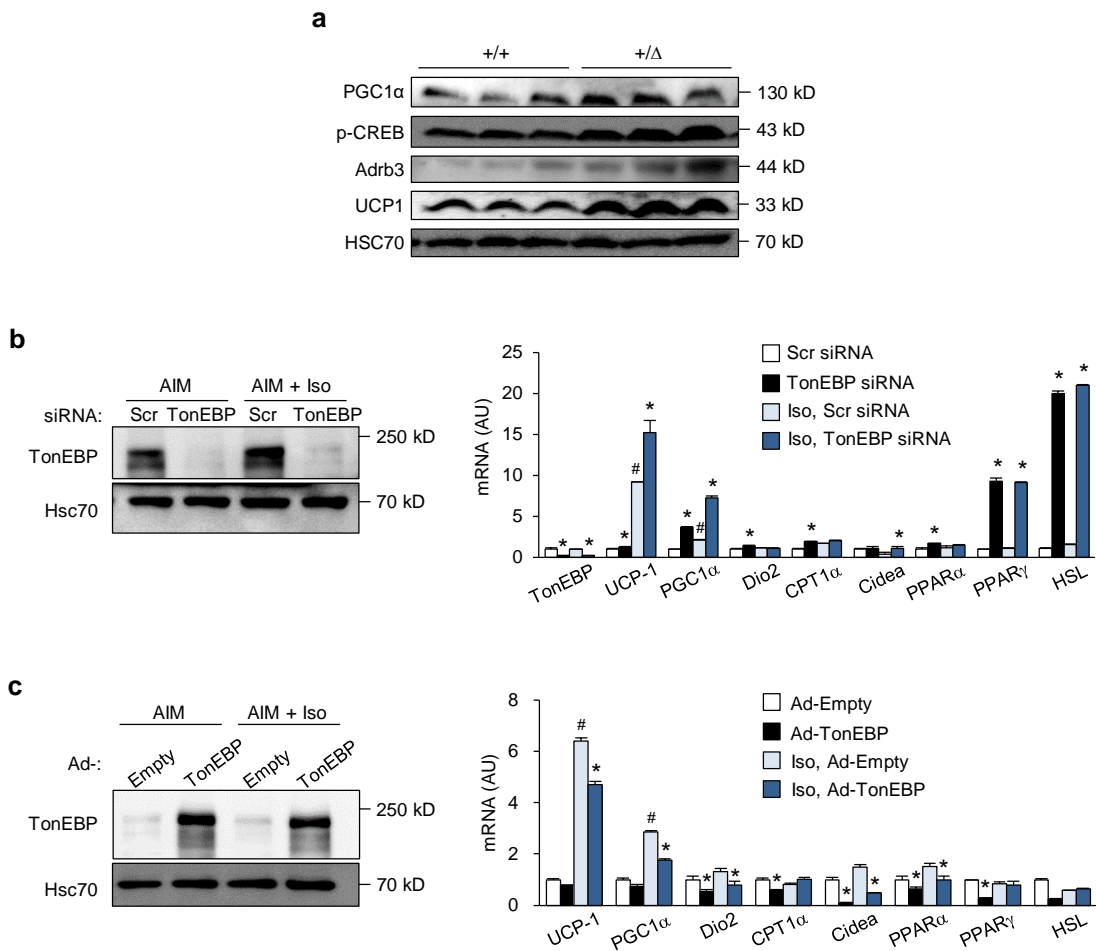

### Supplementary Figure 4. Role of TonEBP on thermogenesis and being *in vitro*.

**a** Higher thermogenic protein expression and adrenergic signaling in adipocytes with TonEBP haplo-deficiency. Immunoblots of PGC1 $\alpha$ , p-CREB, Adrb3, UCP-1 and Hsc70 in primary adipocytes differentiated from SVF of WT (+/+) and TonEBP haplo-deficient mice (+/ $\Delta$ ). **b, c** TonEBP suppresses thermogenic gene expression in 3T3-L1 adipocytes. **(b)** 3T3-L1 cells transfected with siRNA were cultured in adipogenesis inducing medium (AIM) followed by treatment with isoproterenol (Iso) as indicated. **(c)** 3T3-L1 cells cultured in AIM were infected with adenovirus followed by treatment with Iso as indicated. All data are representative of four independent experiments. Data are presented as mean + s.d. **(b, c)**. #  $p < 0.05$  vs. scr siRNA **(b)** or Ad-Empty **(c)**, \*  $p < 0.05$  vs. corresponding scr siRNA **(b)** or Ad-Empty **(c)**. **(b, c)** A 1-way ANOVA was used for comparisons between more than two conditions. Tukey's post-hoc test was used for multiple comparisons. AU, arbitrary unit.

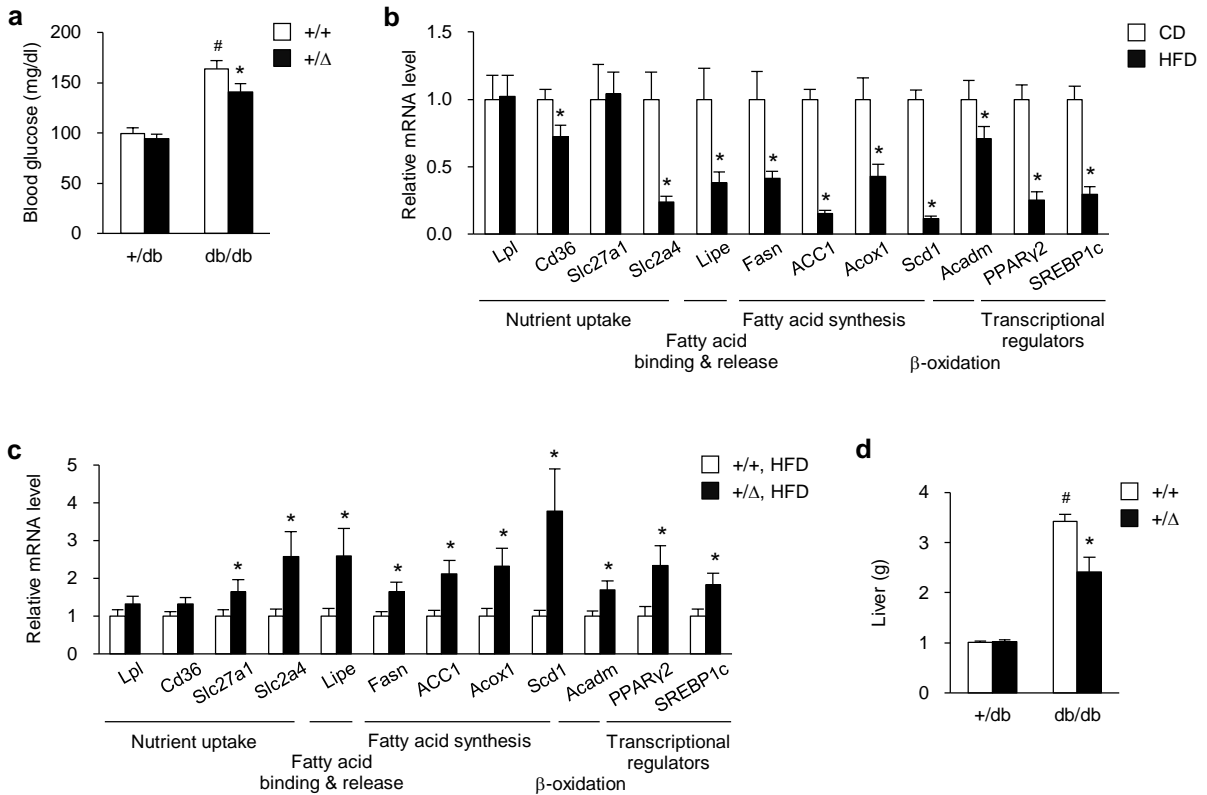

### Supplementary Figure 5. Effects of TonEBP deficiency on metabolic dysfunction.

**a** TonEBP haplo-deficiency decreases fasting blood glucose level in db/db mice. Fasting blood glucose levels of animals shown in Supplementary Figure S2b and c (TonEBP +/+,  $n = 7$ ; TonEBP +/ $\Delta$ ,  $n = 10$ ). Data are representative of two independent experiments and presented as mean + s.e.m. #  $p < 0.05$  vs. +/db, \*  $p < 0.05$  vs. +/+. **b, c** Suppressed lipid metabolism-related genes in response to HFD were restored by TonEBP haplo-deficiency. **(b)** mRNA level of genes involved in lipid metabolism in eWAT from C57BL/6J mice fed CD ( $n = 5$ ) or HFD ( $n = 7$ ). **(c)** mRNA level of genes involved in lipid metabolism in eWAT from HFD-fed animals (TonEBP +/+,  $n = 7$ ; TonEBP +/ $\Delta$ ,  $n = 10$ ). All data are representative of three independent experiments and presented as mean + s.e.m. \*  $p < 0.05$  vs. CD **(b)** or TonEBP +/+ **(c)**. **d** TonEBP haplo-deficiency decreases liver weight in db/db mice. Weight of liver from animals shown in Supplementary Figure 2b and c (TonEBP +/+,  $n = 7$ ; TonEBP +/ $\Delta$ ,  $n = 10$ ). All data are representative of four independent experiments and presented as mean + s.e.m. #  $p < 0.05$  vs. +/db, \*  $p < 0.05$  vs. TonEBP +/+.

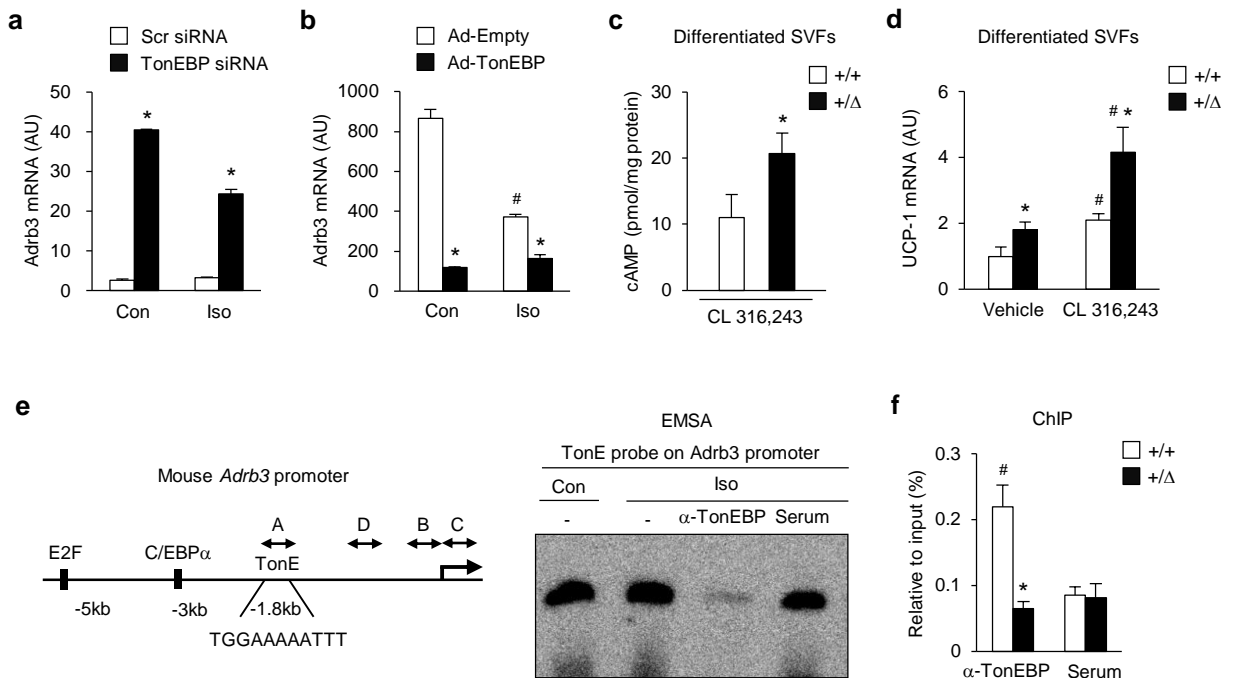

### Supplementary Figure 6. Role of TonEBP on *Adrb3* gene expression.

**a, b** TonEBP suppresses *Adrb3* mRNA expression in 3T3-L1 adipocytes. *Adrb3* mRNA levels in 3T3-L1 adipocytes with siRNA-mediated TonEBP knockdown (**a**) or adenovirus-mediated TonEBP overexpression (**b**) were treated with isoproterenol (Iso) or not (Con) ( $n = 4$ ). All data are representative of three independent experiments. **c** Adipocyte cAMP levels after treatment with an *Adrb3* agonist were elevated in TonEBP haplo-deficiency. Intracellular cAMP levels in CL 316,243 stimulated primary adipocytes differentiated from SVF of WT (+/+) and TonEBP haplo-deficient mice (+/Δ) ( $n = 3$ ). **d** TonEBP haplo-deficiency enhances *UCP-1* mRNA expression. *UCP-1* mRNA levels in primary adipocytes from WT (+/+) and TonEBP haplo-deficient mice (+/Δ) after treatment with CL 316,243 ( $n = 3$ ). Data are representative of two independent experiments. **e, f** TonEBP binds to the *Adrb3* promoter. **(e)** Nuclear extracts were prepared from 3T3-L1 cells treated with Iso or Con. EMSA was performed using a biotin labeled TonE probe. Where indicated, anti-TonEBP serum ( $\alpha$ -TonEBP) or normal serum (Serum) were added for supershift of TonE-TonEBP complex. **(f)** ChIP assays targeting the B region in **(e)** for TonEBP on the *Adrb3* promoter ( $n = 4$ ) using primary adipocytes from WT (+/+) and TonEBP haplo-deficient mice (+/Δ). Data are representative of two independent experiments. Data are presented as mean + s.d. (**a, b**) or s.e.m. (**c, d, f**). #  $p < 0.05$  vs. Con (**b**), corresponding vehicle (**d**) or serum (**f**), \*  $p < 0.05$  vs. corresponding scr siRNA (**a**), Ad-Empty (**b**), corresponding +/+ (**c, d, f**).



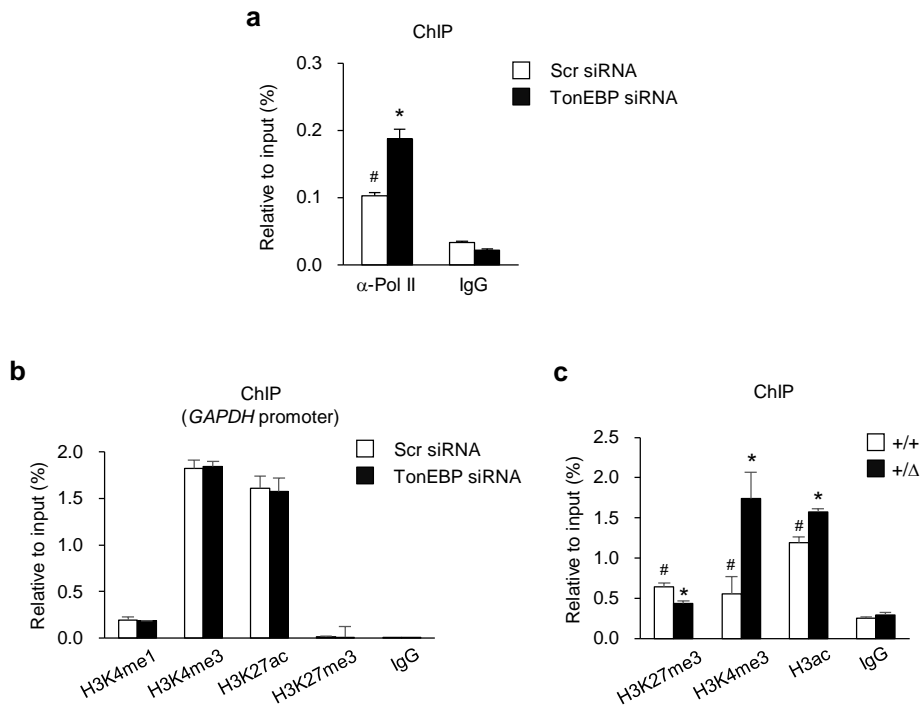

### Supplementary Figure 7. Role of TonEBP on epigenetic changes in gene promoters.

**a** RNA polymerase II binding to the *Adrb3* promoter was elevated by TonEBP deficiency. ChIP assays targeting the B region in (Supplementary Figure 6e) for RNA polymerase II (Pol II) were performed using 3T3-L1 cells transfected with Scr and TonEBP siRNA. Data are representative of two independent experiments. **b** As a control, epigenetic changes in H3K4me1, H3K4me3, H3K27me3 and H3K27ac at the *GAPDH* promoter were performed using 3T3-L1 cells transfected with Scr and TonEBP siRNA. Data are representative of two independent experiments. **c** Epigenetic changes of the *Adrb3* promoter in response to TonEBP haplo-deficiency. ChIP assays for H3K27me3, H3K4me3 and H3ac on the B region in (Supplementary Figure 6e) of *Adrb3* promoter ( $n = 4$ ) were performed in primary adipocytes from WT (+/+) and TonEBP haplo-deficient mice (+/ $\Delta$ ). Data presented as the mean + s.d. (**a, b**) or s.e.m. (**c**). #  $p < 0.05$  vs. corresponding IgG (**a-c**), \*  $p < 0.05$  vs. corresponding scr siRNA (**a, b**), or +/+ (**c**).



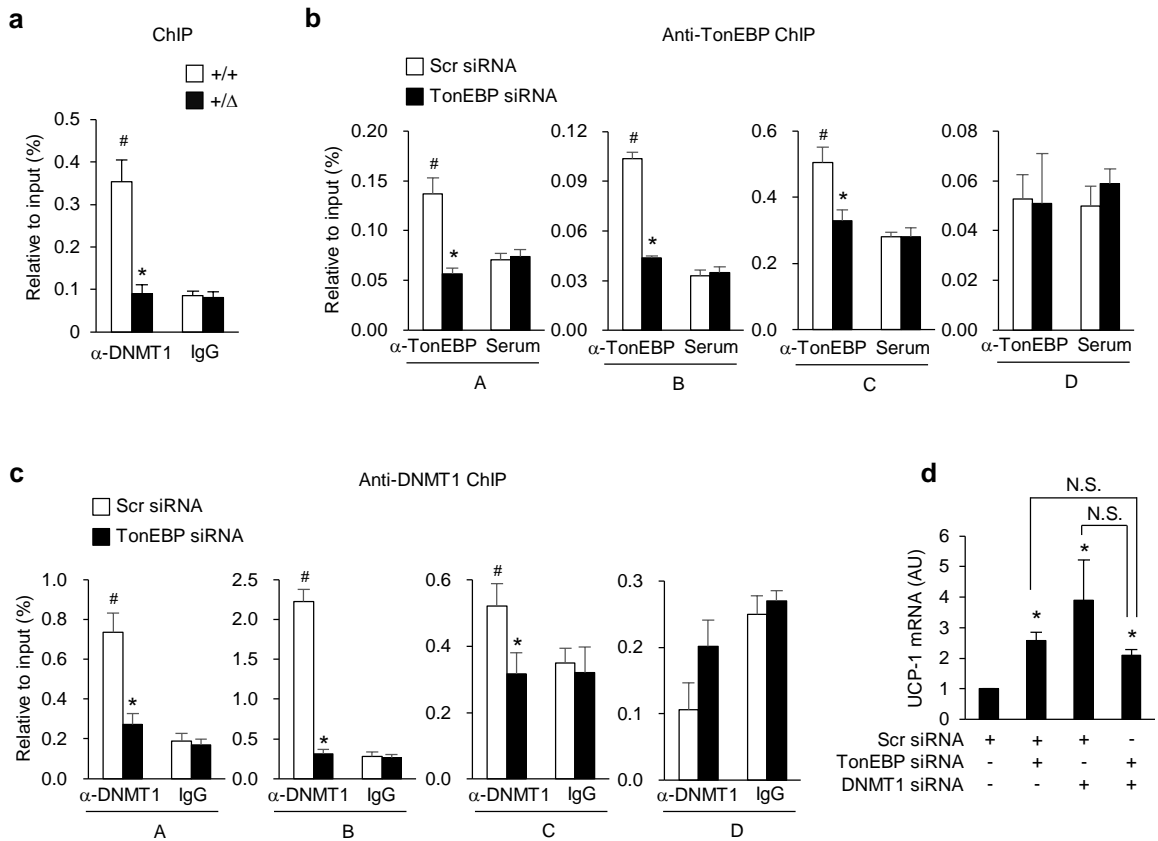

**Supplementary Figure 9. Role of TonEBP in the recruitment of DNMT1 to the *Adrb3* promoter.**

**a** ChIP assays for DNMT1 on the *Adrb3* promoter (B region in Supplementary Figure 5e) ( $n = 4$ ) using primary adipocytes from WT (+/+) and TonEBP haplo-deficient mice (+/Δ). **b, c** TonEBP and DNMT1 bind to the A, B and C regions but not D region, a negative control region (Supplementary Figure 5e) of the *Adrb3* promoter in a manner dependent on TonEBP. ChIP assays were performed for TonEBP (**b**) and DNMT1 (**c**) in 3T3-L1 cells transfected with scrambled (Scr) and TonEBP siRNA. **d** TonEBP and DNMT1 suppress *UCP-1* mRNA expression. *UCP-1* mRNA abundance was measured in 3T3-L1 adipocytes transfected with various siRNA's as indicated. (**a-d**) Data are representative of two independent experiments and presented as the mean + s.d. #  $p < 0.05$  vs. corresponding IgG (**a, c**) or serum (**b**). \*  $p < 0.05$  vs. +/+ (**a**) or Scr siRNA (**b-d**). N.S., not significant (**d**).

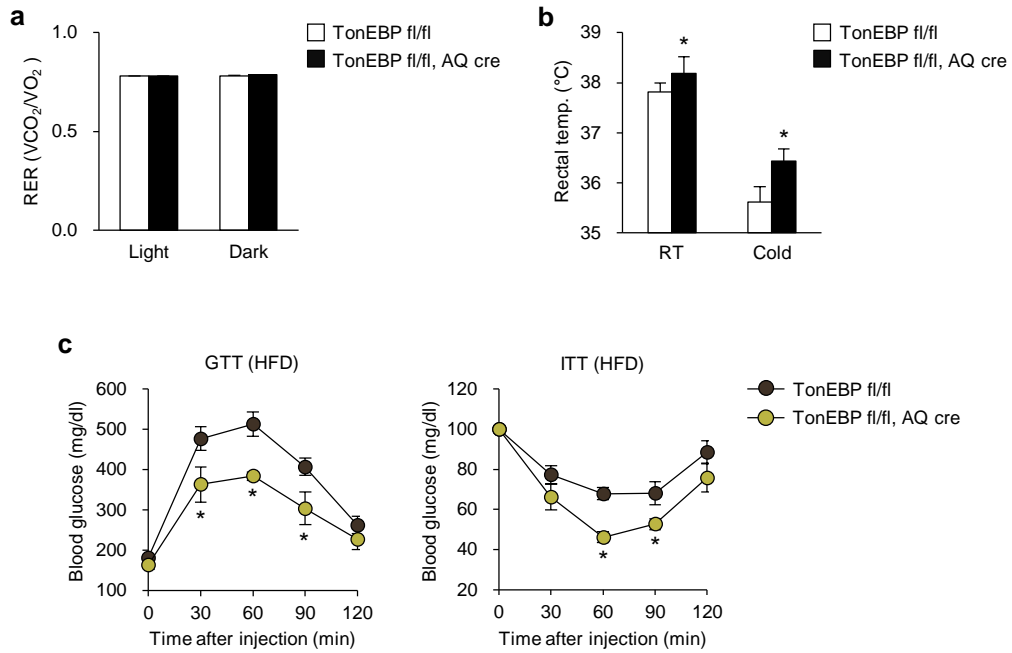

**Supplementary Figure 10. Higher rectal temperature and insulin sensitivity in adipocyte-specific TonEBP deficiency.**

**a** Respiratory exchange ratio (RER) was not affected by adipocyte-specific TonEBP deficiency. HFD-fed animals were analyzed by CLAMS to obtain RER ( $VCO_2/VO_2$ ) ( $n = 4$ ). Data are representative of three independent experiments and presented as mean + s.e.m. **b** Rectal temperature (temp.) measured in HFD-fed animals at room temperature (RT) and after exposure to 4°C (Cold) for 6 h ( $n = 7$ ). **c** Glucose tolerance test (GTT, left) and insulin tolerance test (ITT, right) after 9 weeks on HFD. Data are presented as mean + s.e.m. \*  $p < 0.05$  vs. TonEBP +/+.

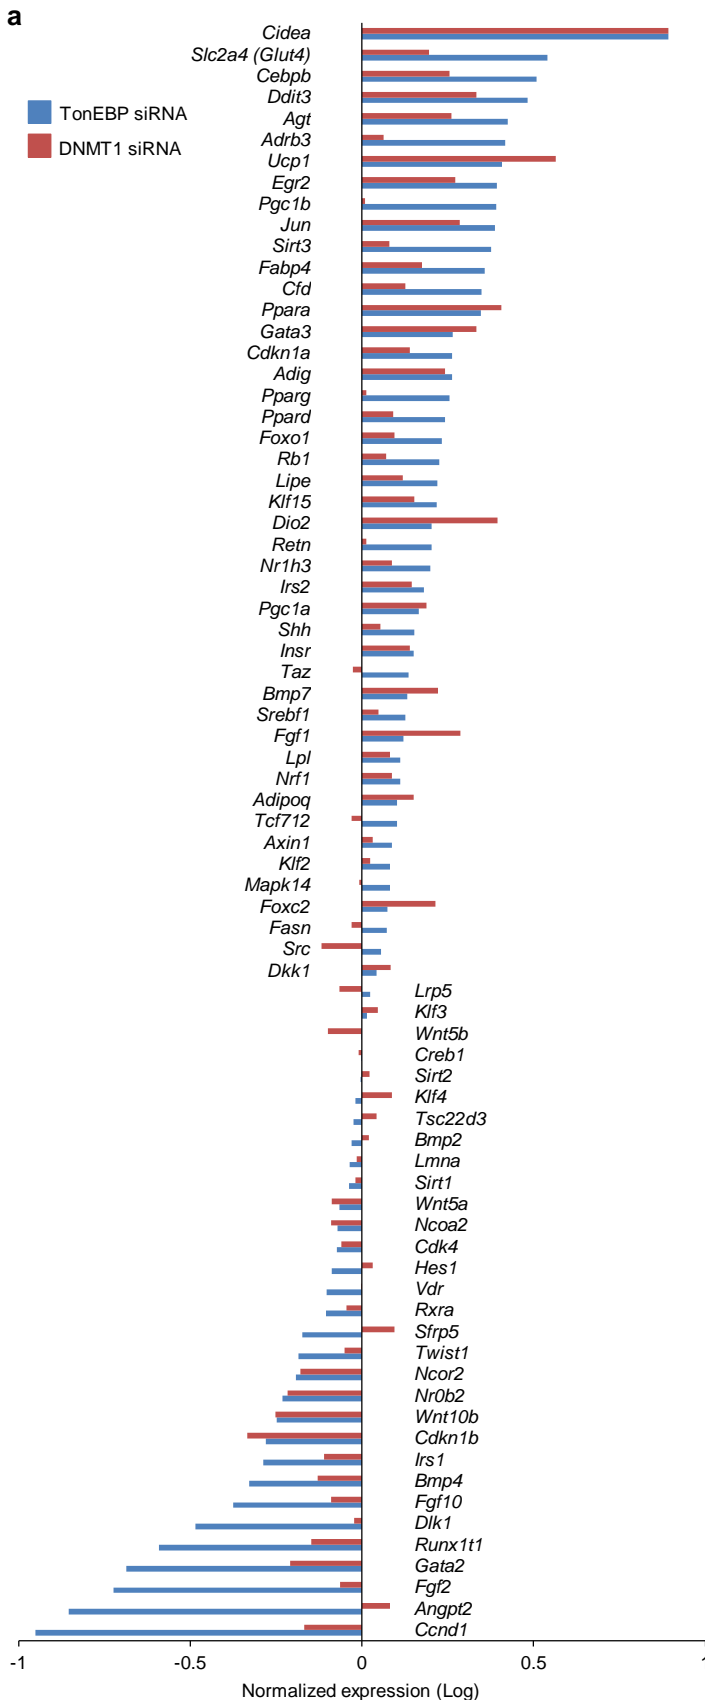

**b**

| TonEBP siRNA \ DNMT1 siRNA | Up | Down | No change |
|----------------------------|----|------|-----------|
| Up                         | 31 | 1    | 10        |
| Down                       | 0  | 10   | 10        |
| No change                  | 2  | 2    | 10        |

| No. | Detail                    | Gene symbol   | TonEBP siRNA | DNMT1 siRNA |
|-----|---------------------------|---------------|--------------|-------------|
| 1   | Adipokine                 | Adig          | up           | up          |
| 2   | Adipokine                 | Adipoq        | up           | up          |
| 3   | Adipokine                 | Cfd           | up           | up          |
| 4   | Adipokine                 | Retn          | up           | no change   |
| 5   | Anti-adipogenesis         | Cdkn1a        | up           | up          |
| 6   | Anti-adipogenesis         | Cdkn1b        | down         | down        |
| 7   | Anti-adipogenesis         | Ddit3         | up           | up          |
| 8   | Anti-adipogenesis         | Dlk1          | down         | no change   |
| 9   | Anti-adipogenesis         | Foxo1         | up           | up          |
| 10  | Anti-adipogenesis         | Hes1          | down         | no change   |
| 11  | Anti-adipogenesis         | Lrp5          | no change    | down        |
| 12  | Anti-adipogenesis         | Ncor2         | down         | down        |
| 13  | Anti-adipogenesis         | Runx1t1       | down         | down        |
| 14  | Anti-adipogenesis         | Shh           | no change    | no change   |
| 15  | Anti-adipogenesis         | Sirt1         | no change    | no change   |
| 16  | Anti-adipogenesis         | Sirt2         | no change    | no change   |
| 17  | Anti-adipogenesis         | Taz           | up           | no change   |
| 18  | Anti-adipogenesis         | Tcf712        | up           | no change   |
| 19  | Anti-adipogenesis         | Tsc22d3       | down         | no change   |
| 20  | Anti-adipogenesis         | Vdr           | no change    | no change   |
| 21  | Anti-brown adipose tissue | Ncoa2         | down         | down        |
| 22  | Anti-brown adipose tissue | Nr0b2         | down         | no change   |
| 23  | Anti-brown adipose tissue | Nr1h3         | up           | up          |
| 24  | Anti-brown adipose tissue | Rb1           | up           | up          |
| 25  | Anti-brown adipose tissue | Twist1        | down         | down        |
| 26  | Anti-brown adipose tissue | Wnt10b        | down         | down        |
| 27  | Anti-white adipose tissue | Gata2         | down         | down        |
| 28  | Anti-white adipose tissue | Gata3         | up           | up          |
| 29  | Anti-white adipose tissue | Klf2          | up           | no change   |
| 30  | Anti-white adipose tissue | Klf3          | no change    | no change   |
| 31  | Hormone                   | Agt           | up           | up          |
| 32  | Hormone                   | Angpt2        | down         | no change   |
| 33  | Lipase                    | Lipe          | up           | up          |
| 34  | Pro-adipogenesis          | Axin1         | up           | no change   |
| 35  | Pro-adipogenesis          | Ccnd1         | down         | down        |
| 36  | Pro-adipogenesis          | Cdk4          | down         | no change   |
| 37  | Pro-adipogenesis          | Cebpb         | up           | up          |
| 38  | Pro-adipogenesis          | Dkk1          | up           | up          |
| 39  | Pro-adipogenesis          | Fabp4         | up           | up          |
| 40  | Pro-adipogenesis          | Fasn          | up           | down        |
| 41  | Pro-adipogenesis          | Fgf1          | up           | up          |
| 42  | Pro-adipogenesis          | Fgf2          | down         | no change   |
| 43  | Pro-adipogenesis          | Irs2          | up           | up          |
| 44  | Pro-adipogenesis          | Lmna          | no change    | no change   |
| 45  | Pro-adipogenesis          | Pparg         | up           | no change   |
| 46  | Pro-adipogenesis          | Rxa           | down         | no change   |
| 47  | Pro-adipogenesis          | Sfrp5         | down         | no change   |
| 48  | Pro-adipogenesis          | Slc2a4(glut4) | up           | up          |
| 49  | Pro-adipogenesis          | Wnt5b         | no change    | no change   |
| 50  | Pro-adipogenesis, lipase  | Lpl           | up           | up          |
| 51  | Pro-adipogenesis          | Jun           | up           | up          |
| 52  | Pro-brown adipose tissue  | Adrb3         | up           | up          |
| 53  | Pro-brown adipose tissue  | Bmp7          | up           | up          |
| 54  | Pro-brown adipose tissue  | Cidea         | up           | up          |
| 55  | Pro-brown adipose tissue  | Creb1         | no change    | no change   |
| 56  | Pro-brown adipose tissue  | Dio2          | up           | up          |
| 57  | Pro-brown adipose tissue  | Foxc2         | no change    | up          |
| 58  | Pro-brown adipose tissue  | Insr          | up           | up          |
| 59  | Pro-brown adipose tissue  | Irs1          | down         | down        |
| 60  | Pro-brown adipose tissue  | Mapk14        | up           | no change   |
| 61  | Pro-brown adipose tissue  | Nrf1          | up           | no change   |
| 62  | Pro-brown adipose tissue  | Pgc1a         | up           | up          |
| 63  | Pro-brown adipose tissue  | Pgc1b         | up           | no change   |
| 64  | Pro-brown adipose tissue  | Ppara         | up           | up          |
| 65  | Pro-brown adipose tissue  | Ppard         | up           | up          |
| 66  | Pro-brown adipose tissue  | Sirt3         | up           | up          |
| 67  | Pro-brown adipose tissue  | Src           | no change    | no change   |
| 68  | Pro-brown adipose tissue  | Ucp1          | up           | up          |
| 69  | Pro-brown adipose tissue  | Wnt5a         | no change    | down        |
| 70  | Pro-white adipose tissue  | Bmp2          | no change    | no change   |
| 71  | Pro-white adipose tissue  | Bmp4          | down         | no change   |
| 72  | Pro-white adipose tissue  | Egr2          | up           | up          |
| 73  | Pro-white adipose tissue  | Fgf10         | down         | down        |
| 74  | Pro-white adipose tissue  | Klf15         | up           | up          |
| 75  | Pro-white adipose tissue  | Klf4          | no change    | up          |
| 76  | Pro-white adipose tissue  | Srebf1        | up           | no change   |

**Supplementary Figure 11. Role of TonEBP and DNMT1 in the regulation of adipocyte physiology-related genes.**

**a** PCR array (Qiagen) data on TonEBP or DNMT1 knockdown 3T3-L1 adipocytes. Data are representative of three independent experiments. **b** The number (top) and list (bottom) of genes regulated by TonEBP or DNMT1 on PCR array.

**Fig. 1b**

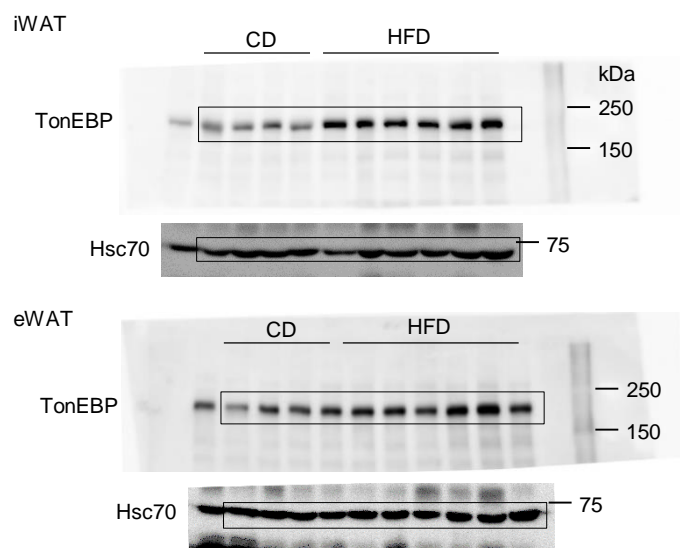

**Fig. 1e**

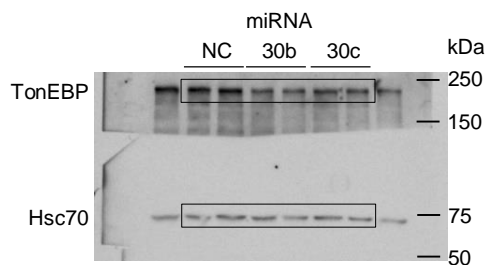

**Fig. 2h**

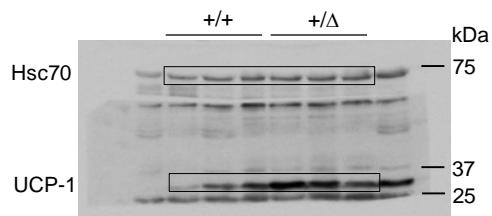

**Fig. 3d**

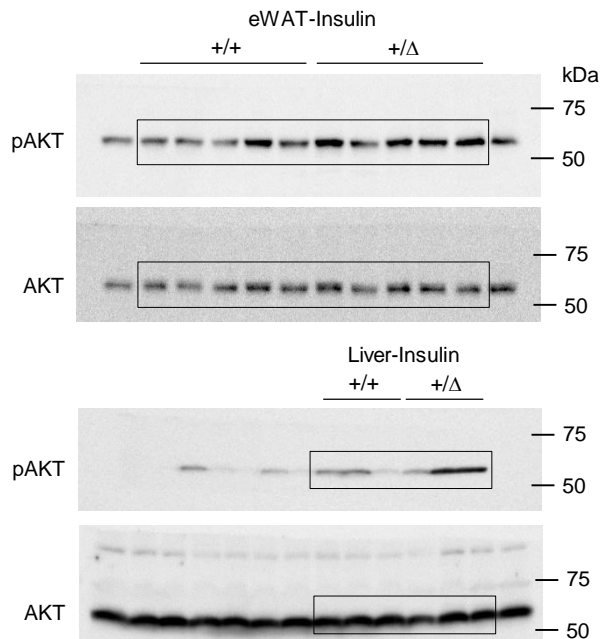

**Supplementary Figure 12. Uncropped blots of Western blots in Figures 1-3.** Original uncropped blots corresponding to Western blots in Figures 1-3 in the manuscript.

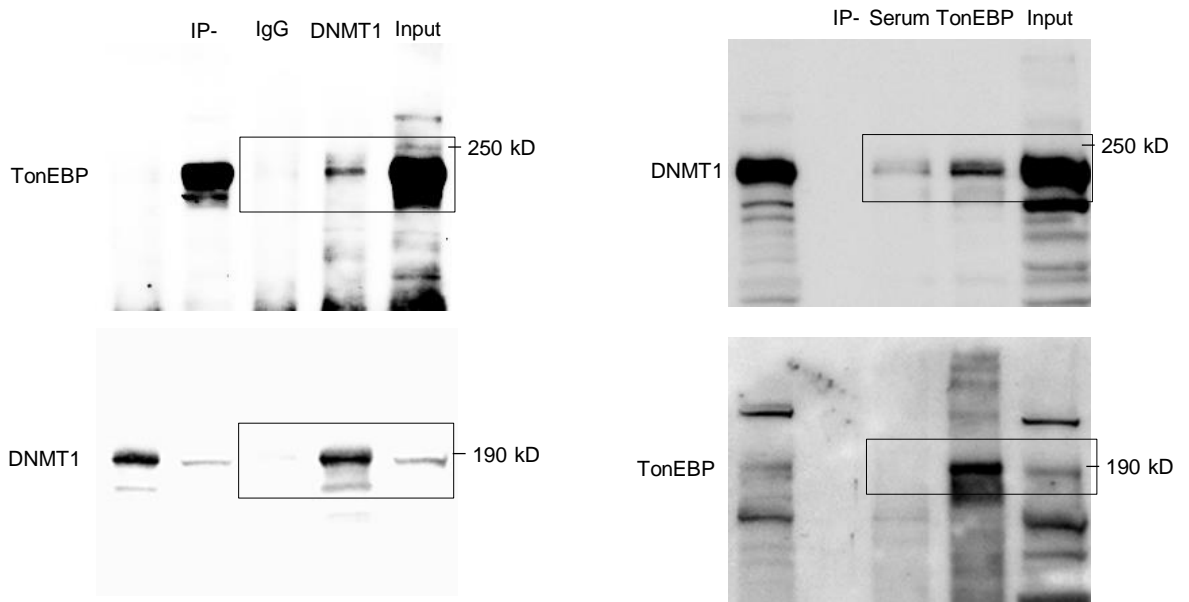

**Supplementary Figure 13. Uncropped blots of Western blots in Figure 4.** Original uncropped blots corresponding to Western blotting of immunoprecipitated proteins in Figure 4n in the manuscript.
